# Supplementary figures and images for: Coordination of planar cell polarity pathways through Spiny-legs
Source: eLife journal article supplement (doi:10.7554/elife.09946), 2015-10-27

Figure 4 supplement 1

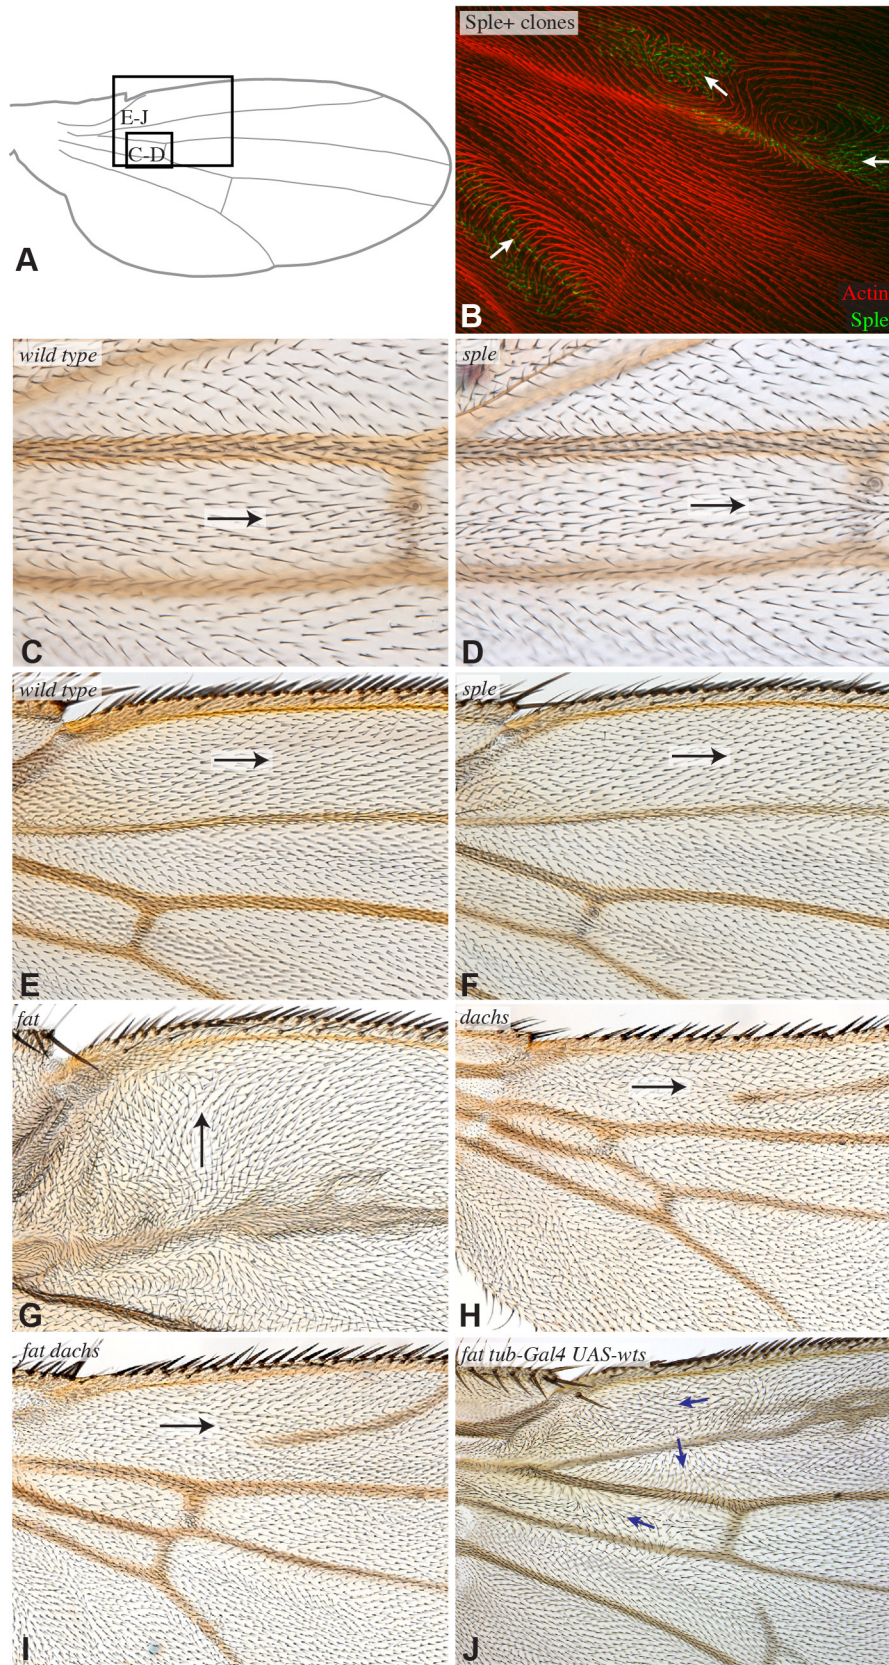

Supplement: supp [file elife-09946-supp-v1.zip]

Figure 6, supplement 1

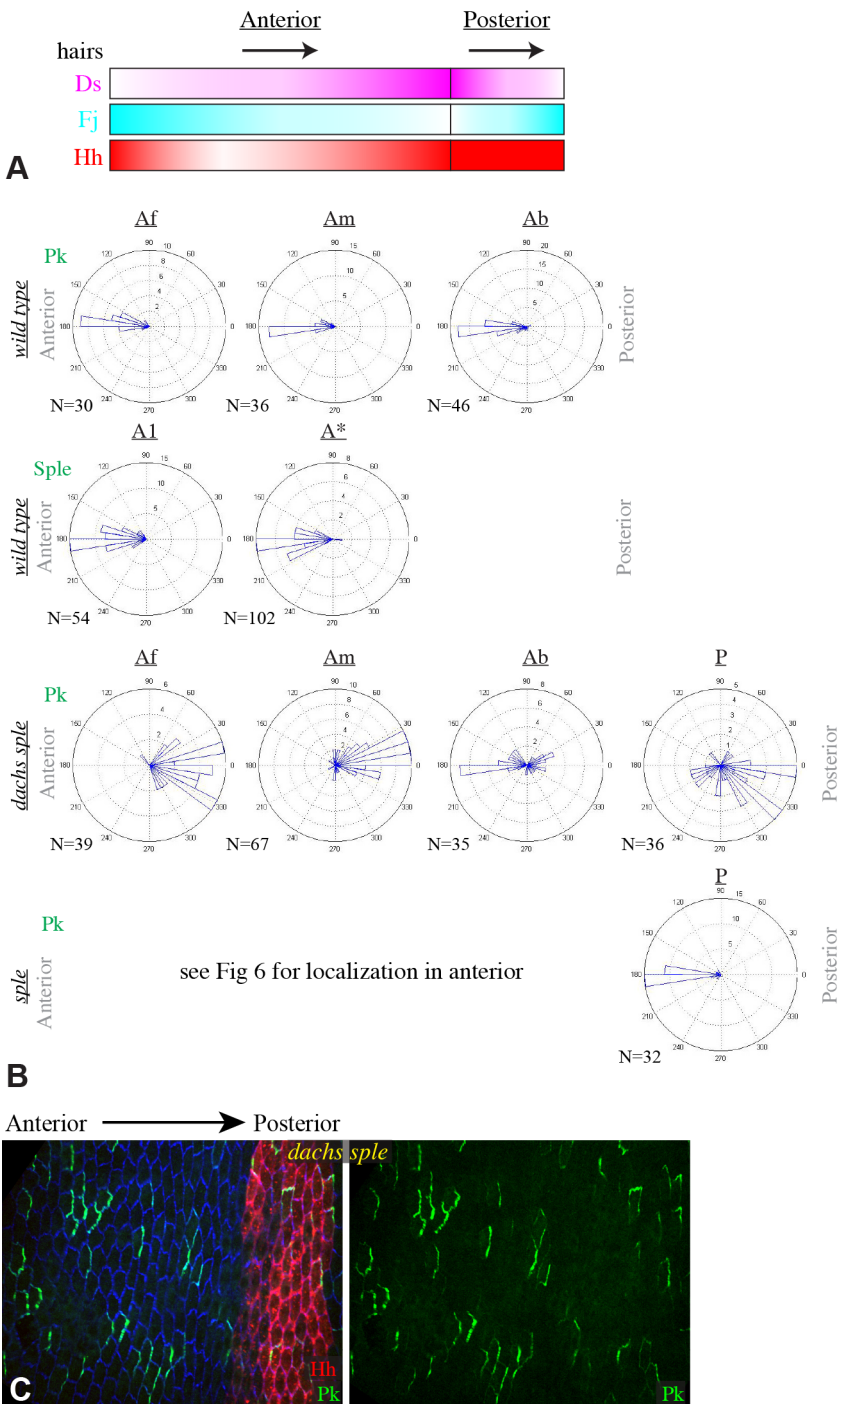

Supplement: supp [file elife-09946-supp-v1.zip]

Figure 1, figure supplement 2

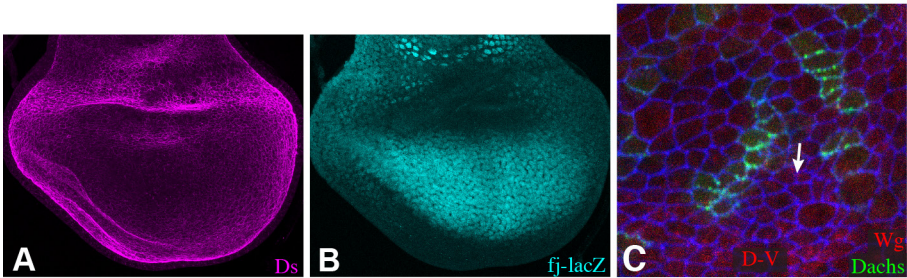

Supplement: supp [file elife-09946-supp-v1.zip]

Figure 5, supplement 1

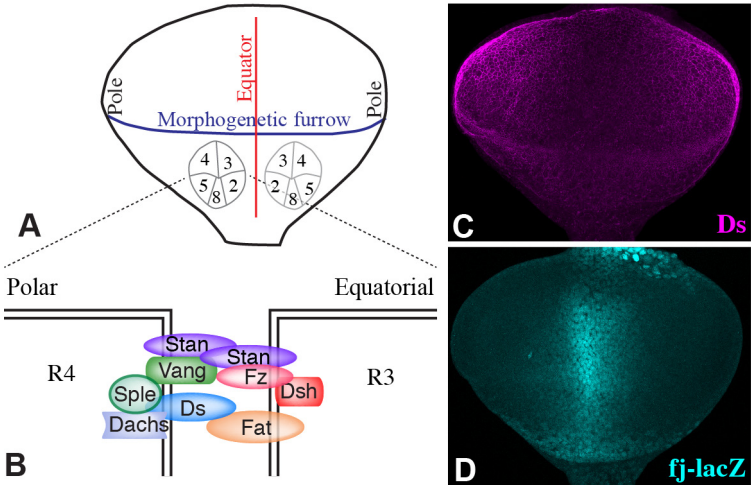

Supplement: supp [file elife-09946-supp-v1.zip]

Figure 5, supplement 2

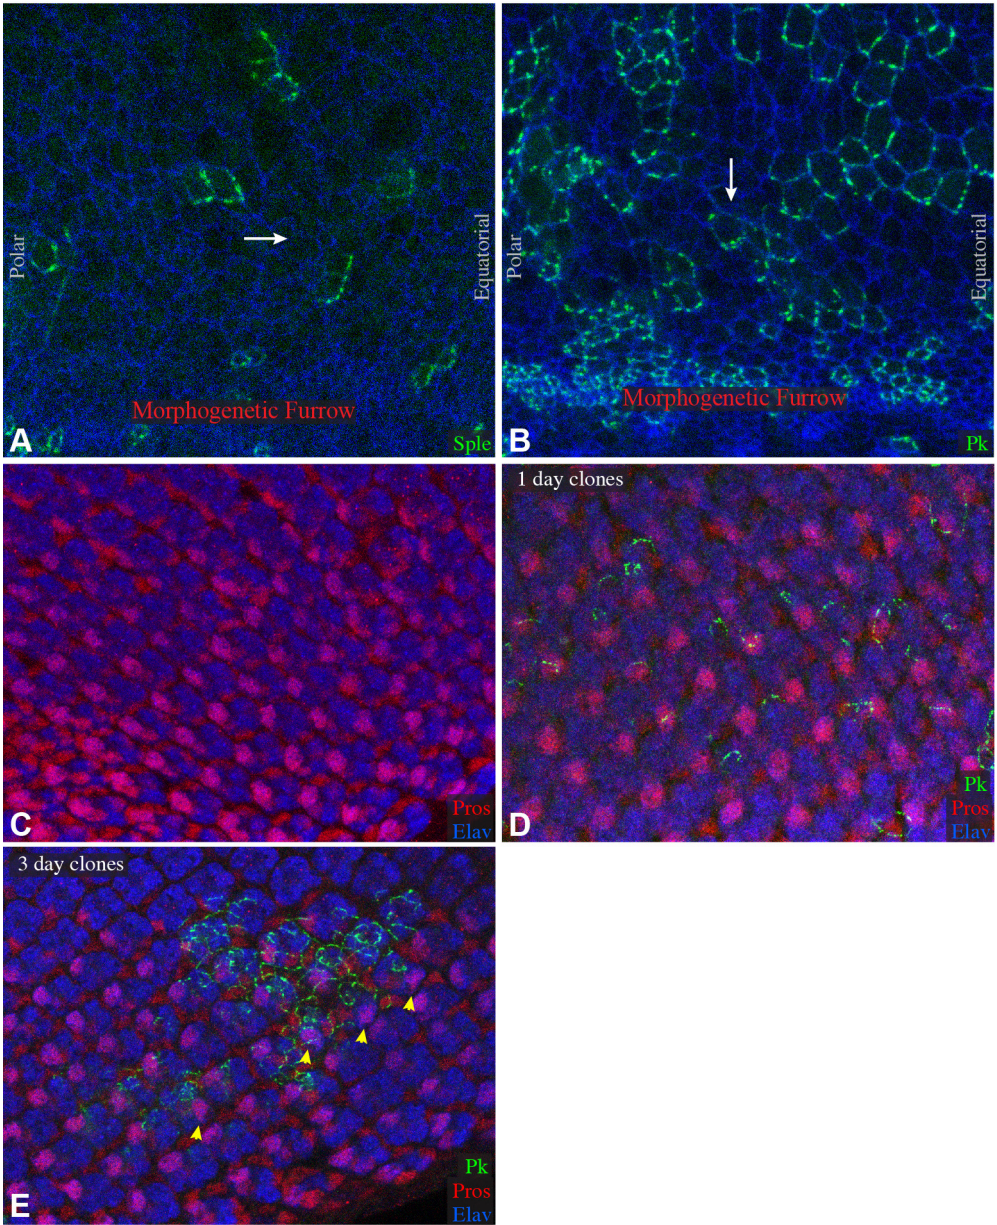

Supplement: supp [file elife-09946-supp-v1.zip]

Figure 1, figure supplement 1

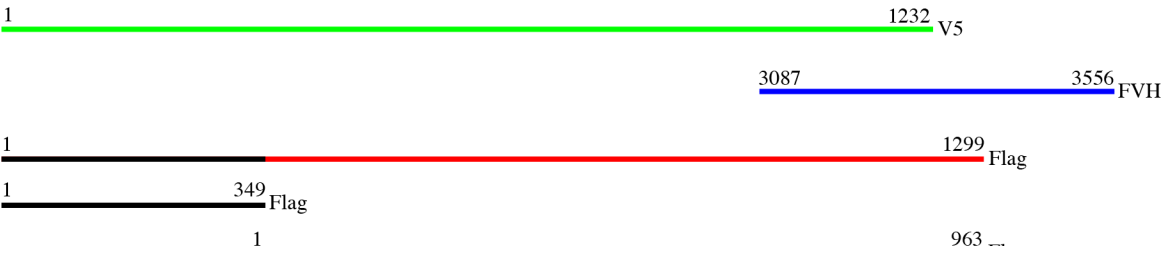

Supplement: supp [file elife-09946-supp-v1.zip]
